# Supplementary material for: Chemotherapy in Pancreatic Cancer: A Systematic Review
Source: Medicina (Kaunas). 2018 Jul 11;54(3):48. doi: 10.3390/medicina54030048 (PMC6122094; doi:10.3390/medicina54030048)
Supplement: Supplementary file 1 [file medicina-54-00048-s001.pdf]

**Supplementary Table 1.** Characteristics of the included studies.

| Nu<br>mbe<br>r | Clinical<br>trial/Phase/S<br>tudy design                                                              | Refer<br>ence              | Ye<br>ar | Target<br>population                                                                                                                                                                             | Treatment(s)                                                                                                                                                                                              | Primary<br>endpoint<br>of<br>efficacy/<br>Seconda<br>ry<br>outcome<br>s                                                                          | Patients<br>on<br>treatmen<br>t(s),n                                                        | Median OS                                                                             | Median<br>PFS                                                                         |
|----------------|-------------------------------------------------------------------------------------------------------|----------------------------|----------|--------------------------------------------------------------------------------------------------------------------------------------------------------------------------------------------------|-----------------------------------------------------------------------------------------------------------------------------------------------------------------------------------------------------------|--------------------------------------------------------------------------------------------------------------------------------------------------|---------------------------------------------------------------------------------------------|---------------------------------------------------------------------------------------|---------------------------------------------------------------------------------------|
| 1              | NCT00690300, DocOx (AIO-PK0106)<br><br>Phase II<br><br>An open label, multicenter, single arm, study. | Ettrich <i>et al.</i> [35] | 2016     | Patients with chemo-refractory advanced pancreatic ductal adenocarcinoma with previous chemotherapy experience (for example gemcitabine as first line therapy for metastatic pancreatic cancer). | <b>75 mg/m<sup>2</sup> docetaxel</b> for 60 minutes on day 1 and <b>80 mg/m<sup>2</sup> oxaliplatin</b> for 120 minutes on day 2 in 21-day cycles. The treatment period was scheduled for up to 8 cycles. | Primary endpoint : tumor response according to RECIST 1.0. Secondary endpoint s: PFS, OS, safety/toxicity, quality of life and clinical benefit. | 44                                                                                          | 10.1 months                                                                           | 1.82 months                                                                           |
| 2              | JapicCTI-111554<br><br>Phase II<br><br>An open-labeled, multicenter, randomized study.                | Ueno <i>et al.</i> [36]    | 2016     | Patients with gemcitabine-refractory advanced pancreatic cancer (first-line treatment was with gemcitabine).                                                                                     | Patients were randomly assigned to receive <b>S-1 at 40, 50 or 60 mg</b> according to body surface area <b>plus 25 mg leucovorin</b> , both given orally twice                                            | Primary endpoint : PFS<br><br>Secondary endpoint s: OS, response rate (RR), disease                                                              | 140 (69 patients in <b>S-1 plus leucovorin group</b> and 71 patients in <b>S-1 group</b> ). | 6.3 months for <b>S-1 plus leucovorin group</b> and 6.1 months for <b>S-1 group</b> . | 3.8 months for <b>S-1 plus leucovorin group</b> and 2.7 months for <b>S-1 group</b> . |

|   |                                                   |                        |      |                                                                                                                                                                                                                                                                                        |                                                                                                                                                                                                                                                                              |                                                                                                                                           |                                                                                          |                                                                                                                                                                                                                                                |                                                                                                                                                                                     |
|---|---------------------------------------------------|------------------------|------|----------------------------------------------------------------------------------------------------------------------------------------------------------------------------------------------------------------------------------------------------------------------------------------|------------------------------------------------------------------------------------------------------------------------------------------------------------------------------------------------------------------------------------------------------------------------------|-------------------------------------------------------------------------------------------------------------------------------------------|------------------------------------------------------------------------------------------|------------------------------------------------------------------------------------------------------------------------------------------------------------------------------------------------------------------------------------------------|-------------------------------------------------------------------------------------------------------------------------------------------------------------------------------------|
|   |                                                   |                        |      |                                                                                                                                                                                                                                                                                        | daily for 1 week, repeated every 2 weeks; or <b>S-1 monotherapy</b> at the same dose as the S-1-leucovorin group for 4 weeks, repeated every 6 weeks.                                                                                                                        | control rate (DCR), duration of response, time to treatment failure (TTF), time to progression (TTP), dose intensity, and adverse events. |                                                                                          |                                                                                                                                                                                                                                                |                                                                                                                                                                                     |
| 3 | Phase II<br><br>A retrospective, two-armed study. | Tai <i>et al.</i> [39] | 2016 | Patients with histological or cytologically confirmed pancreatic adenocarcinoma (locally advanced or metastatic pancreatic cancer) not amenable to curative treatment with surgery or had been documented or suspected of metastases to extra-pancreatic sites. Patients with no prior | <b>Conventional group</b> received <b>conventional therapy (leucovorin, gemcitabine, cisplatin, and fluorouracil)</b> in two week intervals for 12 cycles. <b>Targeted group</b> received <b>conventional therapy plus bevacizumab and cetuximab</b> in each cycle (two week | Primary endpoint: OS<br><br>Secondary endpoint: PFS and the safety profiles of the combined therapy.                                      | 59 (28 patients in <b>conventional group</b> and 31 patients in <b>targeted group</b> ). | 7 months for <b>conventional group</b> and 10 months for <b>targeted group</b> .<br><br>OS for patients <b>≤60 years old</b> : 5 months for <b>conventional group</b> and 12 months for <b>targeted group</b> .<br><br>There was no difference | 3 months for <b>conventional group</b> and 9 months for <b>targeted group</b> .<br><br>PFS for patients <b>≤60 years old</b> : 3 months for <b>conventional group</b> and 10 months |

|   |                                                           |                            |       |                                                     |                                                                                                                                                                                                                                                                                                                                                                                                                                                                                            |                                  |                                           |                                                               |                                                                                                                                             |
|---|-----------------------------------------------------------|----------------------------|-------|-----------------------------------------------------|--------------------------------------------------------------------------------------------------------------------------------------------------------------------------------------------------------------------------------------------------------------------------------------------------------------------------------------------------------------------------------------------------------------------------------------------------------------------------------------------|----------------------------------|-------------------------------------------|---------------------------------------------------------------|---------------------------------------------------------------------------------------------------------------------------------------------|
|   |                                                           |                            |       | chemotherapy were included.                         | intervals for 12 cycles). Conventional treatment arm: 1000 mg/ m <sup>2</sup> gemcitabine, 50 mg/ m <sup>2</sup> cisplatin for the days 1, 8 and 15. The treatment interval for each cycle was 21 days. Targeted group: gemcitabine and cisplatin on day 1 similar to the conventional group, 5 mg/kg bevacizumab (at 8 mg/kg in the first cycle) with 200 mg/ m <sup>2</sup> cetuximab (at 350 mg/ m <sup>2</sup> in the first cycle) and did not receive gemcitabine on the day 8 or 15. |                                  |                                           | between OS of two treatment groups in patients >60 years old. | for <b>targeted group</b> . PFS for patients >60 years old: 3 months for <b>conventional group</b> and 7 months for <b>targeted group</b> . |
| 4 | JASPAC 01 Phase III Randomized , open-label, multicentre, | Uesak a <i>et al.</i> [11] | 20 16 | Patients with histologically proven invasive ductal | <b>Gemcitabine (1000 mg/m(2), intravenousl y</b>                                                                                                                                                                                                                                                                                                                                                                                                                                           | Primary endpoint : OS in the two | 377 (190 to the <b>gemcita bine group</b> | 25.5 months for <b>gemcitabine group</b> ; 46.5               | NA                                                                                                                                          |

|   |                                                                 |                           |      |                                                                                                                                                                                                                                                                                         |                                                                                                                                                                                                                                                                                     |                                                                                                                             |                                                                   |                                                                                                                                                                                                |    |
|---|-----------------------------------------------------------------|---------------------------|------|-----------------------------------------------------------------------------------------------------------------------------------------------------------------------------------------------------------------------------------------------------------------------------------------|-------------------------------------------------------------------------------------------------------------------------------------------------------------------------------------------------------------------------------------------------------------------------------------|-----------------------------------------------------------------------------------------------------------------------------|-------------------------------------------------------------------|------------------------------------------------------------------------------------------------------------------------------------------------------------------------------------------------|----|
|   | non-inferiority trial.                                          |                           |      | carcinoma of the pancreas, pathologically documented stage I-III, and no local residual or microscopic residual tumor, and were aged 20 years or older were eligible. Patients with resected pancreatic cancer with no history of chemotherapy or radiotherapy within the past 3 years. | administered on days 1, 8, and 15, every 4 weeks [one cycle], for up to six cycles) or <b>S-1 (40 mg, 50 mg, or 60 mg</b> according to body-surface area, orally administered twice a day for 28 days followed by a 14 day rest, every 6 weeks [one cycle], for up to four cycles). | treatment groups.                                                                                                           | and 187 to the <b>S-1 group</b> ).                                | months for <b>S-1 group</b> .                                                                                                                                                                  |    |
| 5 | LAP07 Phase III An international, open-label, randomized trial. | Hammel <i>et al.</i> [12] | 2016 | Patients with locally advanced pancreatic cancer. In second randomization: patients with progression-free disease after 4 months. Patients had no prior chemotherapy or radiation therapy.                                                                                              | <b>1000 mg/m2</b> weekly of <b>gemcitabine</b> alone or <b>1000 mg/m2</b> of <b>gemcitabine</b> plus <b>100 mg/d</b> of <b>erlotinib</b> . In second randomization: patients received 2 months of the <b>same chemotherapy</b> or underwent <b>chemoradiation</b> .                 | Primary endpoint: OS from the date of the first randomization. Secondary outcome: effect of erlotinib and quality assurance | 449 (442 in first randomization and 269 in second randomization). | 13.6 months from the date of the first randomization for the 223 patients receiving <b>gemcitabine</b> . 11.9 months for the 219 patients receiving <b>gemcitabine</b> plus <b>erlotinib</b> . | NA |

|   |                                                                     |                          |      |                                                                                                                                                                                                                     |                                                                                  |                                                                                                                                                        |                                 |                                                                                                                                                       |                                                                                                                              |
|---|---------------------------------------------------------------------|--------------------------|------|---------------------------------------------------------------------------------------------------------------------------------------------------------------------------------------------------------------------|----------------------------------------------------------------------------------|--------------------------------------------------------------------------------------------------------------------------------------------------------|---------------------------------|-------------------------------------------------------------------------------------------------------------------------------------------------------|------------------------------------------------------------------------------------------------------------------------------|
|   |                                                                     |                          |      |                                                                                                                                                                                                                     | therapy (54 Gy plus capecitabine) .                                              | e of radiotherapy on OS, PFS of gemcitabine-erlotinib and erlotinib maintenance with gemcitabine alone at the second randomization, and toxic effects. |                                 | OS from the date of the first randomization was not significantly different between chemotherapy at 16.5 months and chemoradiotherapy at 15.2 months. |                                                                                                                              |
| 6 | Phase II<br><br>An open label single arm multi-institutional study. | Stein <i>et al.</i> [28] | 2016 | Patients with untreated metastatic pancreatic cancer (MPC) or locally advanced pancreatic cancer (LAPC). No prior therapy of any type for advanced disease was allowed. Prior adjuvant chemotherapy or radiotherapy | <b>Modified FOLFIRINOX (irinotecan and bolus 5-fluorouracil reduced by 25%).</b> | Primary endpoint : response rate (RR), median PFS and median OS of modified FOLFIRINOX. Adverse events were compared with full-dose                    | 75 (31 with LAPC, 44 with MPC). | In <b>metastatic pancreatic cancer group</b> : 10.2 months. In <b>locally advanced pancreatic cancer group</b> : 26.6 months.                         | In <b>metastatic pancreatic cancer group</b> : 6.1 months. In <b>locally advanced pancreatic cancer group</b> : 17.8 months. |

|   |                                                                                           |                           |          |                                                                                                                                          |                                                                                                                                                                                           |                                                                                                       |                                                                                          |                                                                                                                                   |                                                                                                                                   |
|---|-------------------------------------------------------------------------------------------|---------------------------|----------|------------------------------------------------------------------------------------------------------------------------------------------|-------------------------------------------------------------------------------------------------------------------------------------------------------------------------------------------|-------------------------------------------------------------------------------------------------------|------------------------------------------------------------------------------------------|-----------------------------------------------------------------------------------------------------------------------------------|-----------------------------------------------------------------------------------------------------------------------------------|
|   |                                                                                           |                           |          | for resected pancreatic adenocarcinoma was allowed if more than 6 months had elapsed since completion of prior therapy and registration. |                                                                                                                                                                                           | FOLFIRINOX.                                                                                           |                                                                                          |                                                                                                                                   |                                                                                                                                   |
| 7 | JapicCTI-121987<br><br>Phase I/II<br><br>A non-randomized, open-label, multicenter trial. | Ueno <i>et al.</i> [15]   | 20<br>16 | Japanese patients with metastatic pancreatic cancer. Patients with no prior therapy excluding surgery.                                   | <b>125 mg/m(2) nab-paclitaxel</b> followed by <b>1000 mg/m(2) gemcitabine</b> on day 1, 8, and 15 every 4 weeks.                                                                          | Overall response rate according to Response Evaluation Criteria In Solid Tumors (RECIST) in phase II. | 34                                                                                       | 13.5 months                                                                                                                       | 6.5 months                                                                                                                        |
| 8 | GEST study<br><br>Phase III<br><br>Subgroup analysis of a randomized trial.               | Imaoka <i>et al.</i> [10] | 20<br>16 | Elderly patients (≥ 70 years) with un-resectable pancreatic cancer.                                                                      | <b>Gemcitabine plus S-1 (GS) (1000 mg/m2 IV gemcitabine on days 1 and 8 plus S-1 orally twice daily), or S-1 alone</b> (at a dose calculated according to the body surface area (BSA)) or | Primary endpoint : OS<br><br>Secondary endpoint s: PFS, objective response rate and safety.           | 261 (90 for gemcitabine plus S-1 group, 85 for S-1 group, and 86 for gemcitabine group). | 10.2 months for <b>gemcitabine plus S-1 group</b> , 8.0 months for <b>S-1 group</b> and 8.5 months for <b>gemcitabine group</b> . | 6.9 months in the <b>gemcitabine plus S-1 group</b> , 4.2 months in the <b>S-1 group</b> and 4.5 months in the <b>gemcitabine</b> |

|    |                                                                                        |                                 |          |                                                                                                                                     |                                                                                                                                                                          |                                                                                                                                                        |                                                                                                                 |                                                                                                                                         |                             |
|----|----------------------------------------------------------------------------------------|---------------------------------|----------|-------------------------------------------------------------------------------------------------------------------------------------|--------------------------------------------------------------------------------------------------------------------------------------------------------------------------|--------------------------------------------------------------------------------------------------------------------------------------------------------|-----------------------------------------------------------------------------------------------------------------|-----------------------------------------------------------------------------------------------------------------------------------------|-----------------------------|
|    |                                                                                        |                                 |          |                                                                                                                                     | <b>gemcitabine alone (1000 mg/m<sup>2</sup> on days 1, 8, and 15 of a 28-day cycle).</b>                                                                                 |                                                                                                                                                        |                                                                                                                 |                                                                                                                                         | <b>bine group.</b>          |
| 9  | Phase II<br><br>A single-center, prospective, single-arm study.                        | Belli <i>et al.</i> [29]        | 20<br>16 | Patients with metastatic pancreatic adenocarcinoma (gemcitabine-resistant disease) after gemcitabine-based first-line chemotherapy. | <b>Trabectedin 1.3 mg/m(2)</b> as a 3-h intravenous continuous infusion every 3 weeks for a maximum of 6 months.                                                         | Primary endpoint : PFS rate at 6 months (PFS-6).<br><br>Secondary outcome: to identify inflammatory biomarkers predictive for response to trabectedin. | 25                                                                                                              | 5.2 months (range 1.1-24.3).                                                                                                            | 1.9 months (range 0.8-7.4). |
| 10 | NAPOLI-1 (NCT01494506)<br><br>Phase III<br><br>A global, randomized, open-label trial. | Wang - Gilla <i>et al.</i> [30] | 20<br>16 | Eligible patients with metastatic pancreatic ductal adenocarcinoma previously treated with gemcitabine-based therapy.               | <b>Nanoliposomal irinotecan monotherapy (120 mg/m(2))</b> every 3 weeks, equivalent to 100 mg/m(2) of irinotecan base) or <b>fluorouracil and folinic acid</b> . A third | Primary endpoint : OS<br><br>Safety was assessed in all patients who had received study drug.                                                          | 417 (117 patients in <b>nanoliposomal irinotecan plus fluorouracil and folinic acid group</b> , 151 patients in | In <b>nanoliposomal irinotecan plus fluorouracil and folinic acid group</b> : 6.1 months<br><br>In <b>fluorouracil and folinic acid</b> | NA                          |

|    |                                                                                                                                                                                                                    |                               |      |                                                                                                       |                                                                                                                                                                                                                                             |                                                           |                                                                                                                      |                                                                                                   |                                                |
|----|--------------------------------------------------------------------------------------------------------------------------------------------------------------------------------------------------------------------|-------------------------------|------|-------------------------------------------------------------------------------------------------------|---------------------------------------------------------------------------------------------------------------------------------------------------------------------------------------------------------------------------------------------|-----------------------------------------------------------|----------------------------------------------------------------------------------------------------------------------|---------------------------------------------------------------------------------------------------|------------------------------------------------|
|    |                                                                                                                                                                                                                    |                               |      |                                                                                                       | arm consisting of <b>nanoliposomal irinotecan</b> (80 mg/m <sup>2</sup> ), equivalent to 70 mg/m <sup>2</sup> of irinotecan base) <b>with fluorouracil and folinic acid</b> every 2 weeks was added later (1:1:1), in a protocol amendment. |                                                           | <b>nanoliposomal irinotecan monotherapy group</b> , and 149 patients in <b>fluorouracil and folinic acid</b> group). | <b>group:</b> 4.2 months<br><br>In <b>nanoliposomal irinotecan monotherapy group:</b> 4.9 months. |                                                |
| 11 | Phase II<br><br>A prospective trial which assesses outcomes of patients treated with adjuvant gemcitabine/ cisplatin, stratifying results by tumor excision repair cross-complementing group-1 (ERCC1) expression. | Postlewait <i>et al.</i> [22] | 2016 | Patients with resected pancreatic adenocarcinoma which was previously treated with gemcitabine alone. | <b>1000 mg/m<sup>2</sup> gemcitabine plus 50 mg/m<sup>2</sup> cisplatin.</b> Tumor ERCC1 expression was evaluated by immunohistochemistry and dichotomized into low or high expression.                                                     | Primary outcome s: recurrence-free survival (RFS) and OS. | 22                                                                                                                   | 35.5 months                                                                                       | NA                                             |
| 12 | NCT01064622<br><br>Phase Ib/II                                                                                                                                                                                     | Catenacci <i>et al.</i> [16]  | 2015 | Patients with pancreatic cancer not amenable to curative                                              | <b>Vismodegib plus gemcitabine (GV) or gemcitabine</b>                                                                                                                                                                                      | Primary outcome: PFS.                                     | 106 patients in phase II (53 in                                                                                      | 6.9 and 6.1 months for <b>GV</b> and <b>GP</b> arms,                                              | 4.0 and 2.5 months for <b>GV</b> and <b>GP</b> |

|    |                                                                           |                            |          |                                                                                                                                                                                                                                                                                |                                                                                                                                             |                                                                                                                                           |                                                                                                |                                                                                                   |                     |
|----|---------------------------------------------------------------------------|----------------------------|----------|--------------------------------------------------------------------------------------------------------------------------------------------------------------------------------------------------------------------------------------------------------------------------------|---------------------------------------------------------------------------------------------------------------------------------------------|-------------------------------------------------------------------------------------------------------------------------------------------|------------------------------------------------------------------------------------------------|---------------------------------------------------------------------------------------------------|---------------------|
|    | A multicenter, randomized trial and preclinical pancreatic cancer models. |                            |          | therapy who had received no prior therapy for metastatic disease.                                                                                                                                                                                                              | <b>plus placebo (GP).</b>                                                                                                                   |                                                                                                                                           | each arm).                                                                                     | respectively.                                                                                     | arms, respectively. |
| 13 | Phase II<br><br>An open-label, single-arm study.                          | Wu <i>et al.</i> [24]      | 20<br>15 | Patients with metastatic, un-resectable pancreatic cancer whose disease had progressed on first-line gemcitabine-based therapy.<br><br>Patients were required to have an adequate performance status (ECOG 0-2) and normal hepatic and renal function prior to being enrolled. | <b>Lapatinib 1250 mg PO daily 1 h before or after meals, and capecitabine 1000 mg/m(2) PO twice daily on days 1-14 of the 21-day cycle.</b> | Primary endpoint : median OS<br><br>Secondary endpoint s: objective response rate, PFS and the safety profile of the combination therapy. | 17                                                                                             | 5.2 months                                                                                        | 2.6 months          |
| 14 | NCT01423604<br><br>Phase II<br><br>Randomized , Double-Blind Study.       | Hurwitz <i>et al.</i> [25] | 20<br>15 | Patients with metastatic pancreatic cancer who had experienced treatment failure with gemcitabine.                                                                                                                                                                             | <b>Ruxolitinib (15 mg twice daily) plus capecitabine (1,000 mg/m(2) twice daily) or placebo plus capecitabine.</b>                          | Primary endpoint : OS<br><br>Secondary endpoint s: PFS, clinical benefit response                                                         | 127 (64 in <b>ruxolitinib plus capecitabine group</b> , 63 in <b>placebo plus capecitabine</b> | 4.5 months in <b>ruxolitinib plus capecitabine group</b><br><br>4.3 months in <b>placebo plus</b> | NA                  |

|    |                                                                  |                         |          |                                                                                                                                 |                                                                                                                                                                                                                                                                  | objective response rate, and safety.                                                                                                                                      | bine group).             | capecitabine group.                 |                                   |
|----|------------------------------------------------------------------|-------------------------|----------|---------------------------------------------------------------------------------------------------------------------------------|------------------------------------------------------------------------------------------------------------------------------------------------------------------------------------------------------------------------------------------------------------------|---------------------------------------------------------------------------------------------------------------------------------------------------------------------------|--------------------------|-------------------------------------|-----------------------------------|
| 15 | Phase I/II<br><br>An open-label, multi-center, single-arm study. | Goji <i>et al.</i> [9]  | 20<br>15 | Patients with unresectable pancreatic cancer confined to the pancreatic region with no earlier treatment for pancreatic cancer. | <b>Fixed-dose-rate gemcitabine (FDR-gem) (300-400 mg/m(2), 5 mg/m(2)/min )</b> on days 1, 8, 22, and 29 and <b>60 mg/m(2) of S-1 orally</b> on days 1-14, 22-35. <b>A total radiation dose</b> of 50.4 Gy (1.8 Gy/day, 28 fractions) was delivered concurrently. | Primary endpoint in the dose escalation phase (step 1): to establish the recommended phase II dose.<br><br>Secondary objectives: severity of adverse events, PFS, and OS. | 17 patients in phase II. | 16.0 months                         | 11.0 months                       |
| 16 | Phase II<br><br>A multicenter study.                             | Maki <i>et al.</i> [26] | 20<br>15 | Patients who had no more than one previous chemotherapy regimen for their pancreatic adenocarcinoma.                            | <b>Sorafenib 200 mg</b> orally twice daily along with <b>oxaliplatin 85 mg/m(2)</b> IV on days 1 and 15, followed by <b>capecitabine 2250 mg/m(2)</b>                                                                                                            | Primary objective : response rate.<br><br>Secondary objective s: PFS,                                                                                                     | 24                       | 8.1 months (range 1.5-13.6 months). | 6.0 months (range 1.5-13 months). |

|    |                                                                                                |                         |      |                                                           |                                                                                                                                                                                                                                                                                                                            |                                          |                                 |                                                                                                                                                                                                                                                                                                                                           |                                                                                                                                                                                                                                                                        |
|----|------------------------------------------------------------------------------------------------|-------------------------|------|-----------------------------------------------------------|----------------------------------------------------------------------------------------------------------------------------------------------------------------------------------------------------------------------------------------------------------------------------------------------------------------------------|------------------------------------------|---------------------------------|-------------------------------------------------------------------------------------------------------------------------------------------------------------------------------------------------------------------------------------------------------------------------------------------------------------------------------------------|------------------------------------------------------------------------------------------------------------------------------------------------------------------------------------------------------------------------------------------------------------------------|
|    |                                                                                                |                         |      |                                                           | orally every 8 h for six doses starting on days 1 and 15 of a 28-day cycle.                                                                                                                                                                                                                                                | OS, and safety.                          |                                 |                                                                                                                                                                                                                                                                                                                                           |                                                                                                                                                                                                                                                                        |
| 17 | NCT01608841<br><br>Phase II<br><br>A single-center, randomized, open-label, prospective trial. | Wang <i>et al.</i> [13] | 2015 | Chemotherapy-naïve metastatic pancreatic cancer patients. | <b>Gemcitabine (1000 mg/m<sup>2</sup>)</b> as 30 minutes infusion on days 1, 8, 15, 22, 29, 36 and 43 followed by a 1-week rest in cycle 1 and on days 1, 8, and 15 in all subsequent 4-week cycles) or <b>gemcitabine plus erlotinib</b> (gemcitabine like gemcitabine alone, erlotinib orally <b>100 mg</b> once a day). | Primary endpoint : disease control rate. | 88 (44 patients in each group). | 7.2 months in <b>gemcitabine plus erlotinib group.</b> 4.4 months in <b>gemcitabine alone group.</b> In <b>gemcitabine group</b> OS was similar regardless of the presence of EGFR mutations. In <b>gemcitabine plus erlotinib group</b> , patients with EGFR mutations had a significantly longer OS (8.7 months <i>vs.</i> 6.0 months). | 3.8 months in <b>gemcitabine plus erlotinib group.</b> 2.4 months in <b>gemcitabine alone group.</b> In <b>gemcitabine group</b> PFS was similar regardless of the presence of EGFR mutations. In <b>gemcitabine plus erlotinib group</b> , patients with EGFR mutatio |

|    |                                                                                       |                    |      |                                                                                                                  |                                                                                                                                                                                                                                                                   |                                                                                                                                          |                                                                             |                                                                        |                                                                        |
|----|---------------------------------------------------------------------------------------|--------------------|------|------------------------------------------------------------------------------------------------------------------|-------------------------------------------------------------------------------------------------------------------------------------------------------------------------------------------------------------------------------------------------------------------|------------------------------------------------------------------------------------------------------------------------------------------|-----------------------------------------------------------------------------|------------------------------------------------------------------------|------------------------------------------------------------------------|
|    |                                                                                       |                    |      |                                                                                                                  |                                                                                                                                                                                                                                                                   |                                                                                                                                          |                                                                             |                                                                        | ns had a significantly longer PFS (5.9 months vs. 2.4 months).         |
| 18 | NCT00923299<br><br>Phase I/II<br><br>A single-arm, non-randomized, multicenter trial. | Assen et al. [31]  | 2015 | Advanced pancreatic cancer patients after first-line gemcitabine-based chemotherapy failure.                     | <b>Weekly cetuximab</b> (400mg/m <sup>2</sup> , then <b>250mg/m<sup>2</sup></b> ). They were sequentially included in two <b>trastuzumab</b> dose levels: <b>3.0 or 4.0mg/kg</b> , then <b>1.5 or 2.0mg/kg/weekly</b> .                                           | Primary objective : Objective response rate, safety, progression-free survival (PFS) and overall survival (OS).                          | 39 patients in phase 2.                                                     | 4.6 months                                                             | 1.8 months                                                             |
| 19 | Japic CTI-090685<br><br>Phase II<br><br>A randomized, open-label, multicenter study.  | Ohkawa et al. [32] | 2015 | Patients with confirmed progressive disease following the first-line treatment with a gemcitabine-based regimen. | <b>S-1</b> (80/100/120 mg day <sup>-1</sup> ) based on body surface area (BSA), orally, days 1-28, every 6 weeks) or <b>SOX</b> ( <b>S-1</b> 80/100/120 mg day <sup>-1</sup> ) based on BSA, orally, days 1-14, <b>plus oxaliplatin</b> 100 mg m(-2), intravenous | Primary endpoint : PFS<br><br>Secondary endpoint s: OS, time to treatment failure (TTF), response rate (RR), disease control rate (DCR), | 271 (135 patients in <b>S-1 group</b> , 136 patients in <b>SOX group</b> ). | 6.9 months for <b>S-1 group</b> .<br>7.4 months for <b>SOX group</b> . | 2.8 months for <b>S-1 group</b> .<br>3.0 months for <b>SOX group</b> . |

|    |                                                                        |                           |          |                                                                                                                                                                                                                                                                          |                                                                                                                                     |                                                                                                       |                                                                                  |                                                                             |            |
|----|------------------------------------------------------------------------|---------------------------|----------|--------------------------------------------------------------------------------------------------------------------------------------------------------------------------------------------------------------------------------------------------------------------------|-------------------------------------------------------------------------------------------------------------------------------------|-------------------------------------------------------------------------------------------------------|----------------------------------------------------------------------------------|-----------------------------------------------------------------------------|------------|
|    |                                                                        |                           |          |                                                                                                                                                                                                                                                                          | y, day 1, every 3 weeks).                                                                                                           | and safety.                                                                                           |                                                                                  |                                                                             |            |
| 20 | UMIN000009118<br><br>Phase II<br><br>A randomized clinical trial.      | Shimoda <i>et al.</i> [2] | 20<br>15 | Patients who had undergone resection of pancreatic cancer.                                                                                                                                                                                                               | Adjuvant chemotherapy with <b>S-1</b> or <b>gemcitabine</b> after resection of pancreatic cancer.                                   | Primary endpoint : disease-free survival (DFS).                                                       | 57 (29 patients in <b>S-1 group</b> , 28 patients in <b>gemcitabine group</b> ). | 21.5 months in <b>S-1 group</b> , 18.0 months in <b>gemcitabine group</b> . | NA         |
| 21 | NCT01079702<br><br>Phase II<br><br>An open-label, single-center study. | Kordes <i>et al.</i> [27] | 20<br>15 | Patients with advanced adenocarcinoma of the pancreas were enrolled. Eligible patients had a WHO performance status 0-2 and adequate hepatic and renal functions. Also patients with prior chemotherapy in the adjuvant setting or for metastatic disease were eligible. | <b>Capecitabine 1000 mg/m(2)</b> BID day 1-14 and <b>everolimus 10 mg</b> daily ( <b>5 mg</b> BID) in a continuous 21-day schedule. | Primary endpoint : response rate (RR).<br><br>Secondary endpoint s: PFS, OS and 1-year survival rate. | 31                                                                               | 8.9 months                                                                  | 3.6 months |
| 22 | Phase II<br><br>An open-label, single-arm study.                       | Cho <i>et al.</i> [17]    | 20<br>15 | Patients with pancreaticobiliary cancers after a curative-                                                                                                                                                                                                               | Two cycles of <b>gemcitabine</b> and <b>docetaxel</b> followed by                                                                   | Primary endpoint : incidence of                                                                       | 50 (29 patients had pancreatic cancer                                            | 17 months for patients with pancreatic cancer.                              | NA         |

|  |  |  |  |                                                                                                                                                                                                                                                                                                                                                                                                                                                                                                                                                                                                                                                                      |                                                                                            |                                                                 |                                                                   |  |
|--|--|--|--|----------------------------------------------------------------------------------------------------------------------------------------------------------------------------------------------------------------------------------------------------------------------------------------------------------------------------------------------------------------------------------------------------------------------------------------------------------------------------------------------------------------------------------------------------------------------------------------------------------------------------------------------------------------------|--------------------------------------------------------------------------------------------|-----------------------------------------------------------------|-------------------------------------------------------------------|--|
|  |  |  |  | <p>intent resection and with no prior chemotherapy or radiation therapy.</p> <p><b>5FU-based chemoradiation.</b> Four weeks after completing chemoradiation, two cycles of <b>gemcitabine</b> and <b>docetaxel</b> were administered.</p> <p><b>Gemcitabine</b> was given at a dose of <b>1000 mg/m<sup>2</sup></b> as a 30-min intravenous (IV) infusion on days 1 and 8 with <b>docetaxel</b> at <b>35 mg/m<sup>2</sup></b> IV on days 1 and 8 of a 21-day cycle for two cycles prior to radiation therapy.</p> <p><b>5FU</b> was given at <b>225 mg/m<sup>2</sup></b> per day as a continuous infusion throughout radiation starting 3 weeks after the second</p> | <p>severe toxicities.</p> <p>Secondary endpoint s: disease-free survival (DFS) and OS.</p> | <p>and 21 patients had biliary tract or ampullary cancers).</p> | <p>23 months for patients with resected biliary tract cancer.</p> |  |
|--|--|--|--|----------------------------------------------------------------------------------------------------------------------------------------------------------------------------------------------------------------------------------------------------------------------------------------------------------------------------------------------------------------------------------------------------------------------------------------------------------------------------------------------------------------------------------------------------------------------------------------------------------------------------------------------------------------------|--------------------------------------------------------------------------------------------|-----------------------------------------------------------------|-------------------------------------------------------------------|--|

|    |                                                                                                 |                                  |          |                                                                                               |                                                                                                                                                                                                                                                                                                               |                                                                                                                   |                                                                                                                   |                                                                                                                                       |                                                                     |
|----|-------------------------------------------------------------------------------------------------|----------------------------------|----------|-----------------------------------------------------------------------------------------------|---------------------------------------------------------------------------------------------------------------------------------------------------------------------------------------------------------------------------------------------------------------------------------------------------------------|-------------------------------------------------------------------------------------------------------------------|-------------------------------------------------------------------------------------------------------------------|---------------------------------------------------------------------------------------------------------------------------------------|---------------------------------------------------------------------|
|    |                                                                                                 |                                  |          |                                                                                               | cycle of<br>gemcitabine.                                                                                                                                                                                                                                                                                      |                                                                                                                   |                                                                                                                   |                                                                                                                                       |                                                                     |
| 23 | MPACT<br>(NCT00844649)<br><br>Phase III<br><br>An international, multicenter, open-label study. | Golds tein <i>et al.</i><br>[14] | 20<br>15 | Patients with metastatic pancreatic cancer with no prior chemotherapy for metastatic disease. | <b>Nab-paclitaxel + gemcitabine</b> (a 30- to 40-minute intravenous infusion of <i>nab</i> -paclitaxel <b>125mg/m2</b> , followed by an infusion of gemcitabine <b>1000mg/m2</b> on days 1, 8, 15, 29, 36, and 43) or <b>gemcitabine alone</b> ( <b>1000mg/m2</b> weekly for seven of eight weeks (cycle 1)). | Primary endpoint : OS.                                                                                            | 861 (431 patients in <b>nab-paclitaxel plus gemcitabine arm</b> , 430 patients in <b>gemcitabine alone arm</b> ). | 8.7 months for patients in <b>nab-paclitaxel plus gemcitabine group</b> , 6.6 months for patients in <b>gemcitabine alone group</b> . | NA                                                                  |
| 24 | Phase II<br><br>A randomized study.                                                             | Petrolini <i>et al.</i><br>[18]  | 20<br>15 | Patients with metastatic pancreatic cancer with no prior chemotherapy.                        | The treatment in GEMOXEL arm (combination of gemcitabine, oxaliplatin and capecitabine) consisted of <b>gemcitabine 1,000 mg/m(2)</b> as a 30-min intravenous infusion on days 1, 8, 15,                                                                                                                      | Primary endpoint : disease control rate (DCR).<br><br>Secondary endpoint s: safety, PFS, quality of life, and OS. | 67 (34 patients in <b>GEMOXEL group</b> , 33 patients in <b>GEM group</b> ).                                      | 11.9 months in <b>GEMOXEL arm</b> and 7.1 months in <b>GEM arm</b> .                                                                  | 6.8 months in <b>GEMOXEL arm</b> and 3.7 months in <b>GEM arm</b> . |

|    |                                                                 |                                            |          |                                                                                                      |                                                                                                                                                                                                                                                                                                                                                                                                                                                                                                                                                                                                |                                                                                    |    |                |               |
|----|-----------------------------------------------------------------|--------------------------------------------|----------|------------------------------------------------------------------------------------------------------|------------------------------------------------------------------------------------------------------------------------------------------------------------------------------------------------------------------------------------------------------------------------------------------------------------------------------------------------------------------------------------------------------------------------------------------------------------------------------------------------------------------------------------------------------------------------------------------------|------------------------------------------------------------------------------------|----|----------------|---------------|
|    |                                                                 |                                            |          |                                                                                                      | <p>22,<br/> <b>oxaliplatin</b><br/> <b>100 mg/m(2)</b><br/> i.v. on day 2,<br/> and<br/> <b>capecitabine</b><br/> <b>1,500</b><br/> <b>mg/m(2)/day</b><br/> in two<br/> divided<br/> doses on days<br/> 1-14, every 21<br/> days (one<br/> cycle).</p> <p>In<br/> gemcitabine<br/> alone group,<br/> <b>gemcitabine</b><br/> was<br/> administered<br/> weekly for<br/> seven<br/> consecutive<br/> weeks<br/> followed by<br/> 1-week rest<br/> for the first 8<br/> weeks, and<br/> thereafter,<br/> gemcitabine<br/> was<br/> continued on<br/> days 1, 8, 15,<br/> every 28<br/> days.</p> |                                                                                    |    |                |               |
| 25 | NCT0114605<br>4<br><br>Phase II<br><br>A single-<br>arm, multi- | Herm<br>an <i>et</i><br><i>al.</i><br>[19] | 20<br>15 | Patients with<br>locally<br>advanced<br>pancreatic<br>cancer<br>(LAPC) with<br>no prior<br>abdominal | <b>Gemcitabine</b><br><b>(1000</b><br><b>mg/m(2))</b> for<br>up to three<br>weeks<br>followed by a<br>1-week <b>break</b><br><b>and</b>                                                                                                                                                                                                                                                                                                                                                                                                                                                        | Primary<br>endpoint<br>: the rate<br>of late<br>(more<br>than 3<br>months<br>after | 49 | 13.9<br>months | 7.8<br>months |

|  |                      |  |  |                                                                                                                                 |                                                                                                                                                                                          |                                                                                                                                                                                                                                                                                                                                       |  |  |  |
|--|----------------------|--|--|---------------------------------------------------------------------------------------------------------------------------------|------------------------------------------------------------------------------------------------------------------------------------------------------------------------------------------|---------------------------------------------------------------------------------------------------------------------------------------------------------------------------------------------------------------------------------------------------------------------------------------------------------------------------------------|--|--|--|
|  | institutional study. |  |  | <p>radiotherapy. Patients with more than 3 doses of gemcitabine before stereotactic body radiotherapy (SBRT) were excluded.</p> | <p><b>stereotactic body radiotherapy (SBRT)</b> (33.0 gray [Gy] in 5 fractions). After SBRT, patients continued to receive <b>gemcitabine</b> until disease progression or toxicity.</p> | <p>SBRT) gastritis, fistula, enteritis or ulcer of grade more than 2 and any other late grade 3 to 4 GI toxicity attributable to gemcitabine and SBRT.</p> <p>Secondary endpoint s: freedom from local disease progression (FFLP); acute gastritis, fistula, enteritis, or ulcer of grade more than 2 and any other acute grade 3</p> |  |  |  |
|--|----------------------|--|--|---------------------------------------------------------------------------------------------------------------------------------|------------------------------------------------------------------------------------------------------------------------------------------------------------------------------------------|---------------------------------------------------------------------------------------------------------------------------------------------------------------------------------------------------------------------------------------------------------------------------------------------------------------------------------------|--|--|--|

|    |                                                         |                            |      |                                                                                                                                                 |                                                                                                                                                                                                                                                                                               |                                                                                                                                                             |                                                                              |                                                                                                                                                                           |    |
|----|---------------------------------------------------------|----------------------------|------|-------------------------------------------------------------------------------------------------------------------------------------------------|-----------------------------------------------------------------------------------------------------------------------------------------------------------------------------------------------------------------------------------------------------------------------------------------------|-------------------------------------------------------------------------------------------------------------------------------------------------------------|------------------------------------------------------------------------------|---------------------------------------------------------------------------------------------------------------------------------------------------------------------------|----|
|    |                                                         |                            |      |                                                                                                                                                 |                                                                                                                                                                                                                                                                                               | to 4 GI toxicity attributable to gemcitabine and SBRT; OS; PFS; usefulness of FDG-PET images for estimation of survival outcome; and quality of life (QoL). |                                                                              |                                                                                                                                                                           |    |
| 26 | NCT01065870<br><br>Phase II<br><br>A prospective study. | Sherman <i>et al.</i> [20] | 2015 | Pancreatic adenocarcinoma patients presenting with locally advanced, un-resectable disease because of arterial or extensive venous involvement. | Patients in both arterial and venous arms were treated with 3 week cycle for 6 cycles of <b>GTX (neoadjuvant gemcitabine (750 mg/m<sup>2</sup>, days 4 and 11), docetaxel (30 mg/m<sup>2</sup>, days 4 and 11), and capecitabine (1500 mg/m<sup>2</sup>, days 1-14)).</b> Those with arterial | Primary endpoint : to achieve resection in at least 50% of the patients in the arterial arm. Patients also were followed for survival and sites             | 45 (34 patients in <b>arterial arm</b> , 11 patients in <b>venous arm</b> ). | 32.5 months for all 45 patients. 29 months for <b>arterial arm</b> . For the <b>venous arm</b> , the median overall survival has not been reached at more than 42 months. | NA |

|    |                                                                                                                                                                        |                                  |      |                                                                                                                                                                                    |                                                                                                                                                                                                            |                                                           |                                                                      |           |                                                                                                                           |
|----|------------------------------------------------------------------------------------------------------------------------------------------------------------------------|----------------------------------|------|------------------------------------------------------------------------------------------------------------------------------------------------------------------------------------|------------------------------------------------------------------------------------------------------------------------------------------------------------------------------------------------------------|-----------------------------------------------------------|----------------------------------------------------------------------|-----------|---------------------------------------------------------------------------------------------------------------------------|
|    |                                                                                                                                                                        |                                  |      |                                                                                                                                                                                    | involvement were treated with <b>GX/RT (gemcitabine and capecitabine/ radiation therapy)</b> after chemotherapy.                                                                                           | of relapse.                                               |                                                                      |           |                                                                                                                           |
| 27 | NCT01010126<br><br>Phase II<br><br>A two-stage multicenter single-arm open-label trial.                                                                                | Hobday <i>et al.</i> [33]        | 2015 | Patients with well or moderately differentiated pancreatic neuroendocrine tumors (PNETs) and progressive disease. Prior systemic treatments for metastatic disease were permitted. | <b>Temsirolimus 25 mg</b> intravenously (IV) once per week (on days 1, 8, 15, and 22) and <b>bevacizumab 10 mg/kg IV</b> once every 2 weeks (on days 1 and 15 of a 28-day cycle).                          | Co-primary endpoint: tumor response rate and 6-month PFS. | 56                                                                   | 34 months | 13.2 months                                                                                                               |
| 28 | RAD001 in Advanced Neuroendocrine Tumors, Third Trial (RADIANT-3)<br><br>Phase III<br><br>A prospective, double-blind, randomized, parallel-group, placebo-controlled, | Lombard-Bohas <i>et al.</i> [34] | 2015 | Patients with advanced, progressive, low- or intermediate-grade pancreatic neuroendocrine tumors (pNET) with no prior cytotoxic chemotherapy, immunotherapy, or radiotherapy       | Patients were prospectively stratified by <b>prior chemotherapy use</b> and World Health Organization performance status and were randomly assigned (1:1) to <b>everolimus 10 mg/d</b> or <b>placebo</b> . | Primary endpoint : PFS                                    | 410 (207 in <b>everolimus group</b> , 203 in <b>placebo group</b> ). | NA        | For chemo-naïve patients: 11.4 months with <b>everolimus</b> and 5.4 months with <b>placebo</b> . For patients with prior |

|    |                                                                                                                          |                             |      |                                                                                                                                                                       |                                                                                                                                                                                                                                |                                                                                                       |                                                                                                     |                                                                                                              |                                                                                                             |
|----|--------------------------------------------------------------------------------------------------------------------------|-----------------------------|------|-----------------------------------------------------------------------------------------------------------------------------------------------------------------------|--------------------------------------------------------------------------------------------------------------------------------------------------------------------------------------------------------------------------------|-------------------------------------------------------------------------------------------------------|-----------------------------------------------------------------------------------------------------|--------------------------------------------------------------------------------------------------------------|-------------------------------------------------------------------------------------------------------------|
|    | multicenter study.                                                                                                       |                             |      | within 4 weeks before randomization.                                                                                                                                  |                                                                                                                                                                                                                                |                                                                                                       |                                                                                                     |                                                                                                              | chemotherapy: 11.0 months with <b>everolimus</b> and 3.2 months with <b>placebo</b> .                       |
| 29 | CESAR (Central European Society for Anticancer Drug Research-EWIV) Phase II A prospective, randomized, open-label trial. | Bergmann <i>et al.</i> [21] | 2015 | Patients with locally advanced, un-resectable or metastatic pancreatic ductal adenocarcinoma (PDAC) without previous chemotherapy for adjuvant or metastatic disease. | <b>Gemcitabine</b> at a dosage of <b>1.000mg/m(2)</b> d1, 8, 15 q28 versus a combination of <b>SUNGEM (gemcitabine plus sunitinib)</b> at a dosage of <b>GEM 1.000mg/m(2)</b> d1+8 and <b>sunitinib 50mg p.o. d1-14, q21d.</b> | Primary endpoint : PFS. Secondary endpoint s: OS, toxicity and overall response rate (ORR).           | 61 (33 patients in <b>gemcitabine group</b> and 28 patients in <b>SUNGEM group</b> ).               | 36.7 weeks for the <b>GEM arm</b> and 30.4 weeks for <b>SUNGEM arm</b> .                                     | 13.3 weeks for <b>GEM arm</b> and 11.6 weeks for <b>SUNGEM arm</b> .                                        |
| 30 | Phase III A randomized, multicenter study.                                                                               | Lee <i>et al.</i> [23]      | 2017 | Patients with advanced pancreatic cancer without prior chemotherapy.                                                                                                  | <b>Gemcitabine plus capecitabine (oral capecitabine 1660mg/m plus gemcitabine 1000mg/m by 30-minute intravenous infusion weekly for 3 weeks followed by a</b>                                                                  | Primary endpoint : median OS. Secondary endpoint s: PFS, overall response rate (ORR), disease control | 214 (108 in <b>gemcitabine plus capecitabine group</b> and 106 in <b>gemcitabine alone group</b> ). | 10.3 months in the <b>gemcitabine plus capecitabine group</b> . 7.5 months in the <b>gemcitabine group</b> . | 6.2 months in the <b>gemcitabine plus capecitabine group</b> . 5.3 months in the <b>gemcitabine group</b> . |

|    |                                                       |                          |      |                                                                                          |                                                                                                                                                                                                                     |                                                                                                |                                                                                 |                                                                                             |                                                                                             |
|----|-------------------------------------------------------|--------------------------|------|------------------------------------------------------------------------------------------|---------------------------------------------------------------------------------------------------------------------------------------------------------------------------------------------------------------------|------------------------------------------------------------------------------------------------|---------------------------------------------------------------------------------|---------------------------------------------------------------------------------------------|---------------------------------------------------------------------------------------------|
|    |                                                       |                          |      |                                                                                          | 1-week break every 4 weeks) or <b>gemcitabine alone</b> (by 30-minute intravenous infusion weekly for 3 weeks every 4 weeks).                                                                                       | rate, and toxicity.                                                                            |                                                                                 |                                                                                             |                                                                                             |
| 31 | Phase II A randomized, multicenter, controlled trial. | Ioka <i>et al.</i> [37]  | 2017 | Patients with gemcitabine-refractory pancreatic cancer.                                  | <b>S-1 (80-120 mg for 14 days every 4 weeks) plus intravenous irinotecan (100 mg/m on days 1 and 15 every 4 weeks) or oral S-1 alone (80-120 mg daily for 28 days every 6 weeks).</b>                               | Primary endpoint : PFS.                                                                        | 127                                                                             | 6.8 months in <b>irinotecan plus S-1 group.</b> 5.8 months in <b>S-1 monotherapy group.</b> | 3.5 months in <b>irinotecan plus S-1 group.</b> 1.9 months in <b>S-1 monotherapy group.</b> |
| 32 | UMIN000009446 Phase II A multicenter study.           | Satoi <i>et al.</i> [38] | 2017 | Chemotherapy-naïve pancreatic ductal adenocarcinoma patients with peritoneal metastasis. | <b>Paclitaxel</b> administered intravenously at <b>50mg/m</b> and intraperitoneal at <b>20mg/m</b> on days 1 and 8. <b>S-1</b> administered at <b>80mg/m/d</b> for 14 consecutive days, followed by 7 days of rest. | Primary endpoint : 1-year overall survival. Secondary endpoint s: antitumor effect and safety. | 33 (22 with peritoneal dissemination and 11 with positive peritoneal cytology). | 16.3 months                                                                                 | NA                                                                                          |

**Supplementary Table 2.** Quality assessment of included studies.

| Author                         | Selection bias | Study design | Confounders | Blinding | Data collection methods | Withdrawals and dropouts | General rating |
|--------------------------------|----------------|--------------|-------------|----------|-------------------------|--------------------------|----------------|
| Ettrich <i>et al.</i> [35]     | Strong         | Weak         | NA          | Weak     | Strong                  | Moderate                 | Weak           |
| Ueno <i>et al.</i> [36]        | Strong         | Strong       | Strong      | Weak     | Strong                  | Moderate                 | Moderate       |
| Tai <i>et al.</i> [39]         | Strong         | Weak         | Strong      | Weak     | Strong                  | Weak                     | Weak           |
| Uesaka <i>et al.</i> [11]      | Moderate       | Strong       | Strong      | Weak     | Strong                  | Strong                   | Moderate       |
| Hammel <i>et al.</i> [12]      | Moderate       | Strong       | Strong      | Weak     | Strong                  | Moderate                 | Moderate       |
| Stein <i>et al.</i> [28]       | Strong         | Weak         | Weak        | Weak     | Strong                  | Moderate                 | Weak           |
| Ueno <i>et al.</i> [15]        | Strong         | Weak         | Moderate    | Weak     | Strong                  | Strong                   | Weak           |
| Imaoka <i>et al.</i> [10]      | Strong         | Strong       | Weak        | Weak     | Strong                  | Strong                   | Weak           |
| Belli <i>et al.</i> [29]       | Strong         | Weak         | NA          | Weak     | Strong                  | Strong                   | Weak           |
| Wang-Gillam <i>et al.</i> [30] | Strong         | Moderate     | Strong      | Weak     | Strong                  | Strong                   | Moderate       |
| Postlewait <i>et al.</i> [22]  | Strong         | Weak         | Strong      | Weak     | Strong                  | Moderate                 | Weak           |
| Catenacci <i>et al.</i> [16]   | Strong         | Strong       | Strong      | Weak     | Moderate                | Moderate                 | Moderate       |
| Wu <i>et al.</i> [24]          | Strong         | Weak         | NA          | Weak     | Strong                  | Strong                   | Weak           |
| Hurwitz <i>et al.</i> [25]     | Strong         | Moderate     | Strong      | Strong   | Strong                  | Strong                   | Strong         |
| Goji <i>et al.</i> [9]         | Strong         | Weak         | Strong      | Weak     | Weak                    | Moderate                 | Weak           |
| Makielski <i>et al.</i> [26]   | Strong         | Weak         | NA          | Weak     | Strong                  | Strong                   | Weak           |
| Wang <i>et al.</i> [13]        | Strong         | Strong       | Strong      | Weak     | Strong                  | Moderate                 | Moderate       |
| Assenat <i>et al.</i> [31]     | Strong         | Weak         | NA          | Weak     | Strong                  | Strong                   | Weak           |
| Ohkawa <i>et al.</i> [32]      | Strong         | Strong       | Strong      | Weak     | Strong                  | Strong                   | Moderate       |

|                                      |          |          |          |        |          |          |          |
|--------------------------------------|----------|----------|----------|--------|----------|----------|----------|
| Shimoda<br><i>et al.</i> [2]         | Moderate | Strong   | Strong   | Weak   | Moderate | Strong   | Moderate |
| Kordes <i>et al.</i> [27]            | Strong   | Weak     | NA       | Weak   | Strong   | Strong   | Weak     |
| Cho <i>et al.</i> [17]               | Strong   | Weak     | Weak     | Weak   | Strong   | Strong   | Weak     |
| Goldstein<br><i>et al.</i> [14]      | Strong   | Moderate | Strong   | Weak   | Strong   | Strong   | Moderate |
| Petrioli <i>et al.</i> [18]          | Strong   | Moderate | Strong   | Weak   | Strong   | Strong   | Moderate |
| Herman <i>et al.</i> [19]            | Moderate | Weak     | NA       | Weak   | Moderate | Strong   | Weak     |
| Sherman<br><i>et al.</i> [20]        | Strong   | Weak     | Moderate | Weak   | Strong   | Moderate | Weak     |
| Hobday <i>et al.</i> [33]            | Strong   | Weak     | NA       | Weak   | Strong   | Strong   | Weak     |
| Lombard-<br>Bohas <i>et al.</i> [34] | Strong   | Moderate | Strong   | Strong | Strong   | Strong   | Strong   |
| Bergmann<br><i>et al.</i> [21]       | Strong   | Moderate | Strong   | Weak   | Strong   | Strong   | Moderate |
| Lee <i>et al.</i> [23]               | Strong   | Strong   | Strong   | Weak   | Strong   | Moderate | Moderate |
| Ioka <i>et al.</i> [37]              | Strong   | Moderate | Strong   | Weak   | Strong   | Strong   | Moderate |
| Satoi <i>et al.</i> [38]             | Moderate | Weak     | NA       | Weak   | Strong   | Strong   | Weak     |
